# Supplementary material for: Chemically tuned, bi-functional polar interlayer for TiO2 photoanodes in fibre-shaped dye-sensitized solar cells
Source: Royal Society of Chemistry journal article supplement (doi:10.1039/c9ta12118h), 2020-01-01
Supplement: c9ta12118h1.pdf [file c9ta12118h1.pdf]

Electronic Supplementary Material (ESI) for Journal of Materials Chemistry A.  
This journal is © The Royal Society of Chemistry 2019

## Electronic Supplementary Information

### **Chemically tuned, bi-functional polar interlayer for TiO<sub>2</sub> photoanodes in fibre-shaped dye-sensitized solar cells**

*Ryanda Enggar Anugrah Ardhi,<sup>a,b</sup> Minh Xuan Tran,<sup>a,b</sup> Manxiang Wang,<sup>c</sup> Guicheng Liu,<sup>\*,a,c</sup> Joong Kee Lee<sup>\*,a,b</sup>*

<sup>a</sup> Center for Energy Storage Research, Clean Energy Institute, Korea Institute of Science and Technology (KIST), Hwarang-ro 14-gil 5, Seongbuk-gu, Seoul 02792, Republic of Korea

<sup>b</sup> Division of Energy and Environment Technology, KIST-School, Korea University of Science and Technology (UST), Hwarang-ro 14-gil 5, Seongbuk-gu, Seoul 02792, Republic of Korea

<sup>c</sup> Department of Physics, Dongguk University, 30 Pildong-ro 1-gil, Jung-gu, Seoul, 04620, Republic of Korea

\* Corresponding authors:

log67@163.com, liuguicheng@dongguk.edu (G. Liu); leejk@kist.re.kr (J. K. Lee).

Tel.: +82 2 958 5252; Fax: +82 2 958 5229.

## Supporting Figures

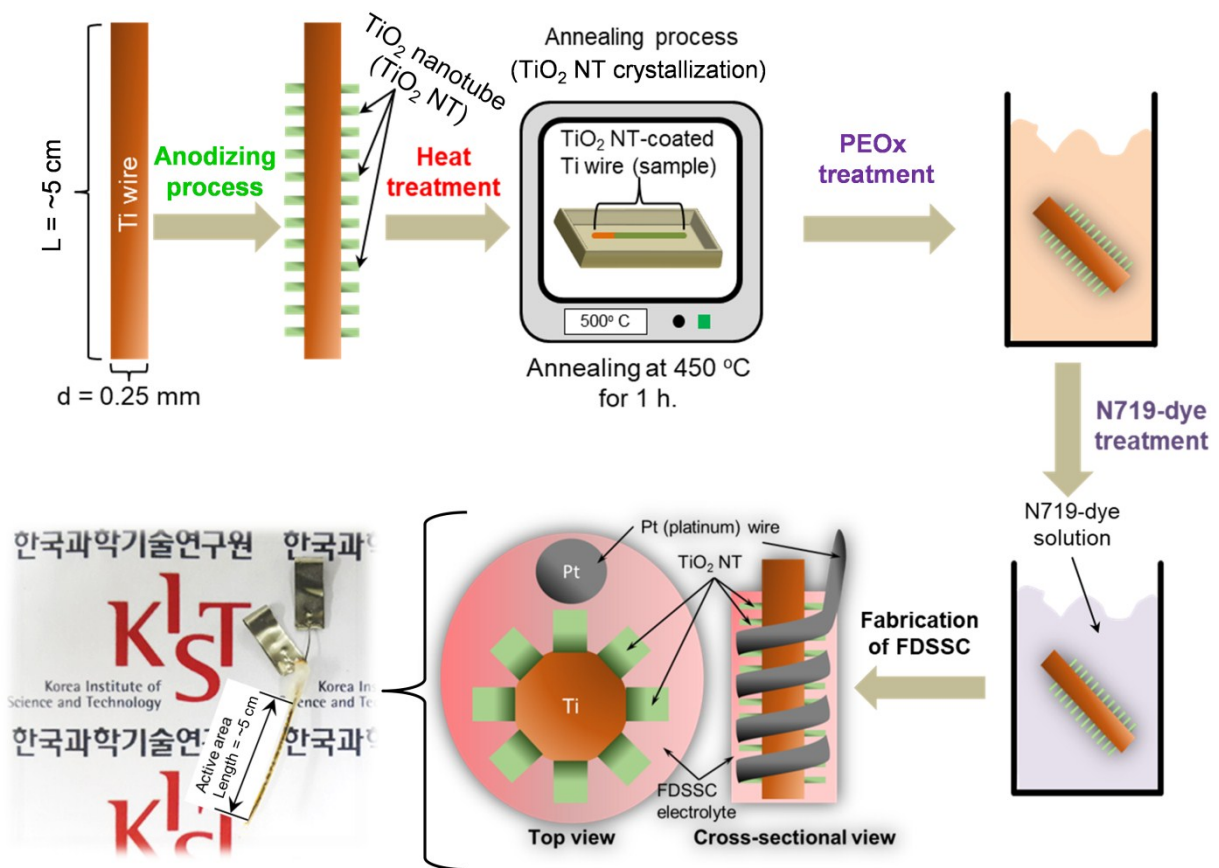

**Fig. S1.** Schematic of the TiO<sub>2</sub>@PEOx-based FDSSC preparation process.

### Anodizing apparatus:

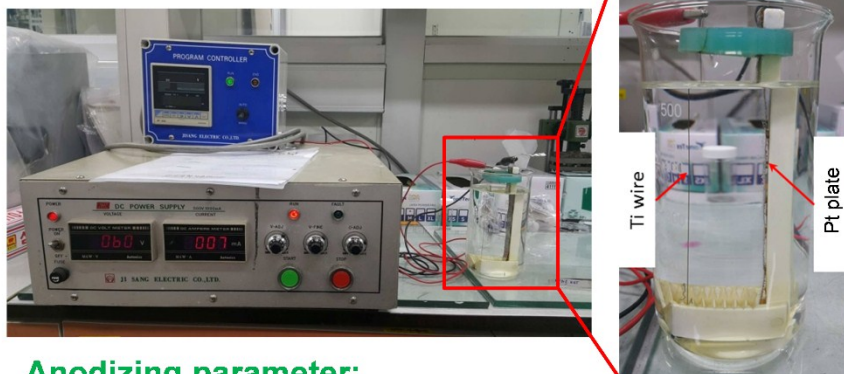

### Anodizing parameter:

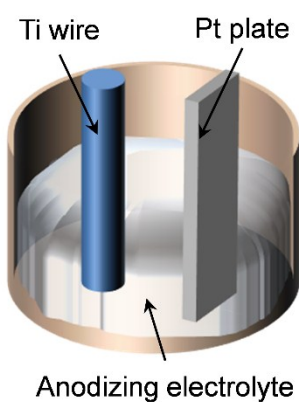

#### Anodizing electrolyte contains

- ✓ Ethylene glycol (EG),
- ✓ 2 vol% of H<sub>2</sub>O, and
- ✓ 0.25 wt% of NH<sub>4</sub>F.

#### Anodizing condition

- ✓ 60 V of DC voltage
- ✓ 6 hours of anodizing time.
- ✓ ~27 °C.

**Fig. S2.** Anodizing apparatus to prepare the TiO<sub>2</sub> nanotube photoanodes used in this work.

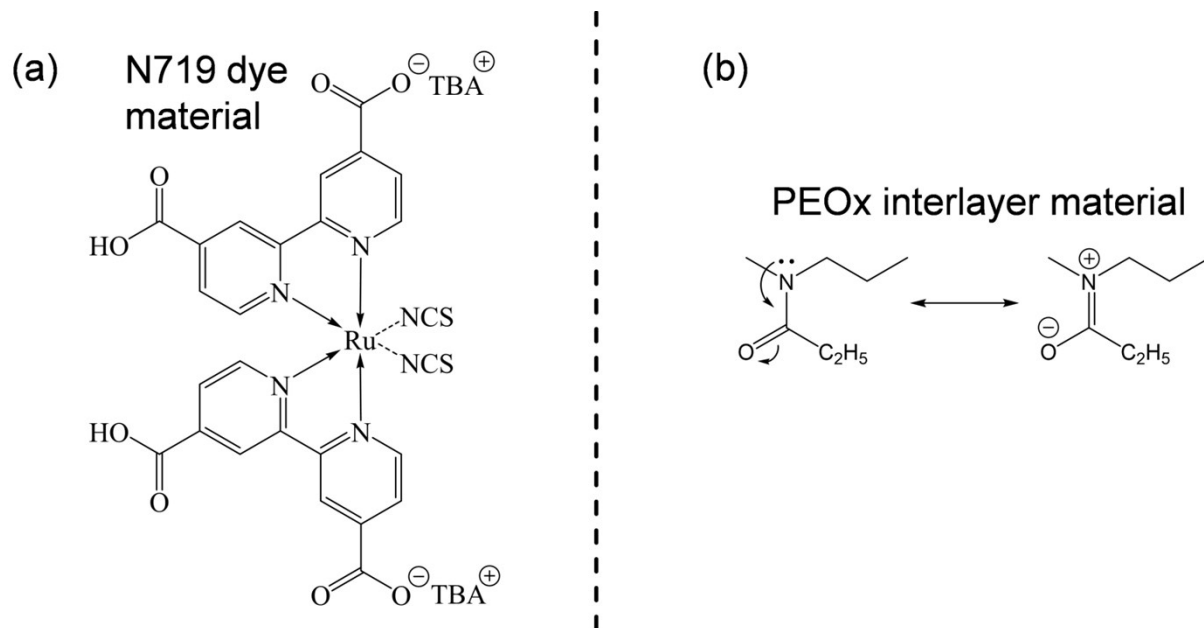

**Fig. S3.** Chemical structures of the (a) N719 dye and (b) PEOx interlayer materials.

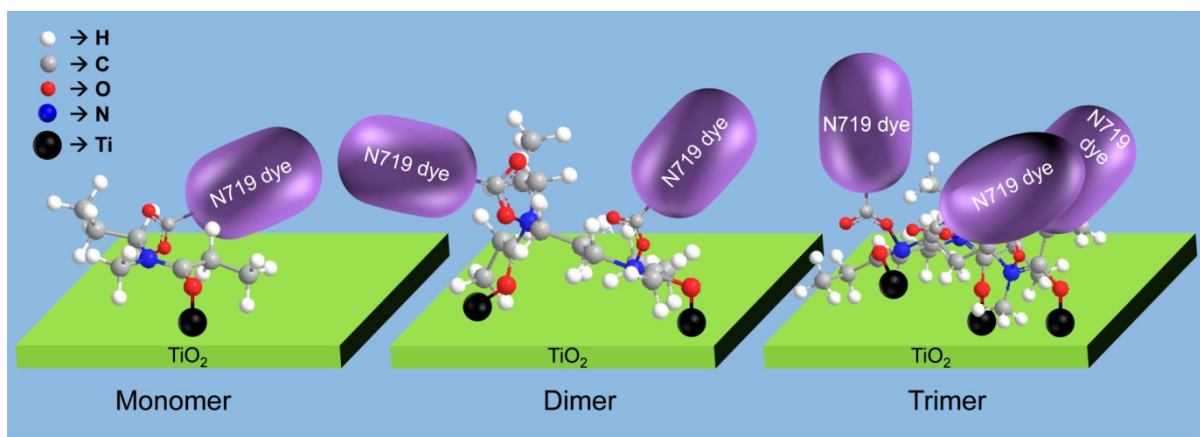

**Fig. S4.** 3D molecular model of the PEOx interlayer material, binding at the TiO<sub>2</sub>/N719 dye interface, with monomer, dimer, and trimer configurations.

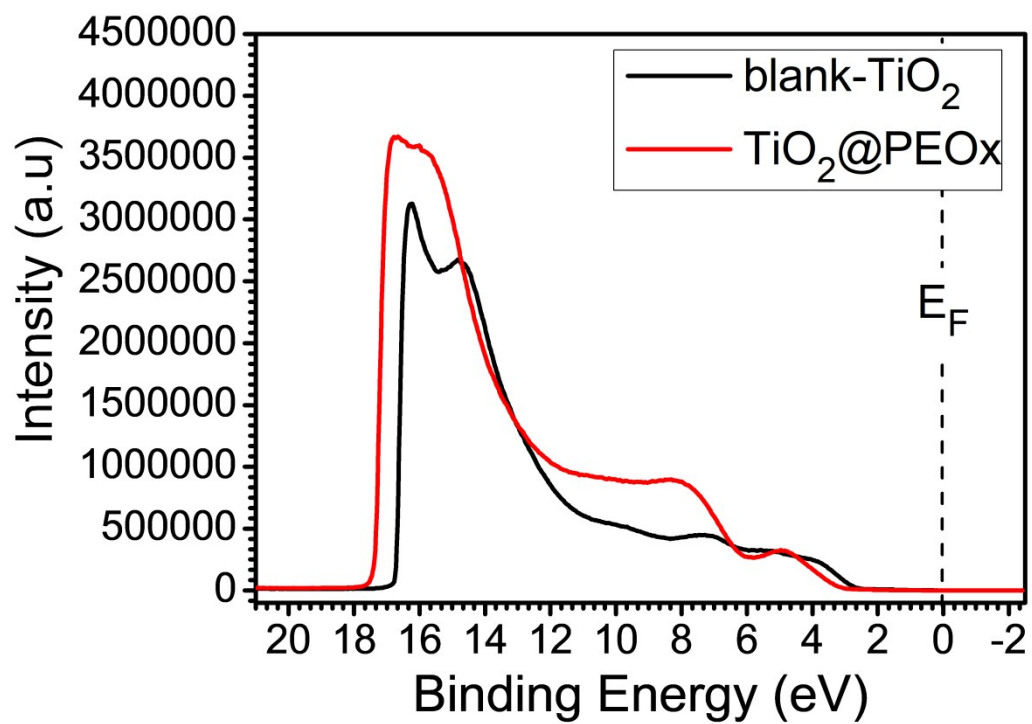

**Fig. S5.** Full-range UPS spectra of blank-TiO<sub>2</sub> and TiO<sub>2</sub>@PEOx samples.

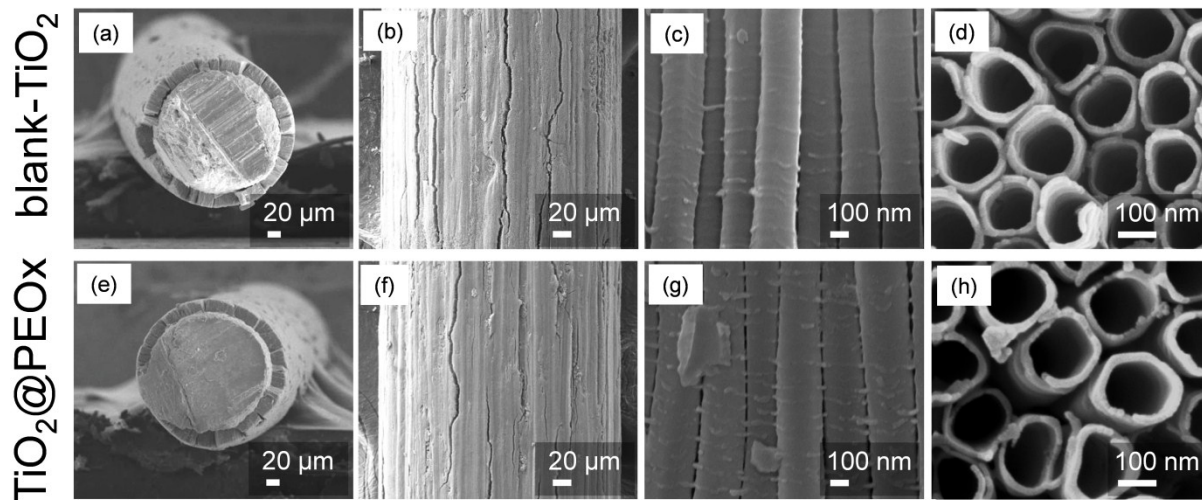

**Fig. S6.** (a, c, e, g) Cross-sectional and (b, d, f, h) surface SEM images of (a–d) blank-TiO<sub>2</sub> and (e–h) TiO<sub>2</sub>@PEOx samples

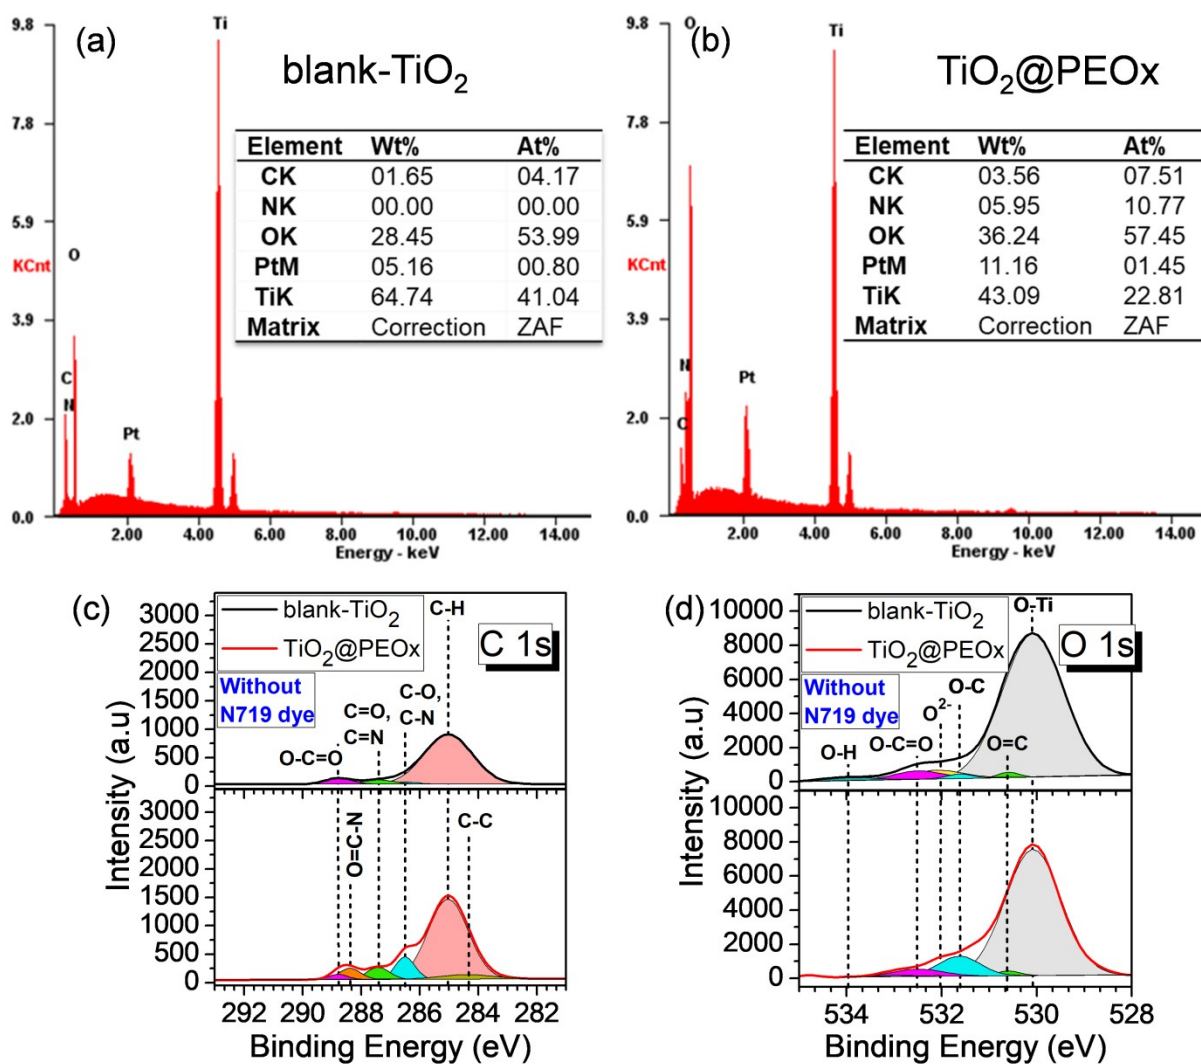

**Fig. S7.** Spectra for blank-TiO<sub>2</sub> and TiO<sub>2</sub>@PEOx samples without dye immersion obtained by (a, b) EDS, (c) C 1s and (d) O 1s XPS.



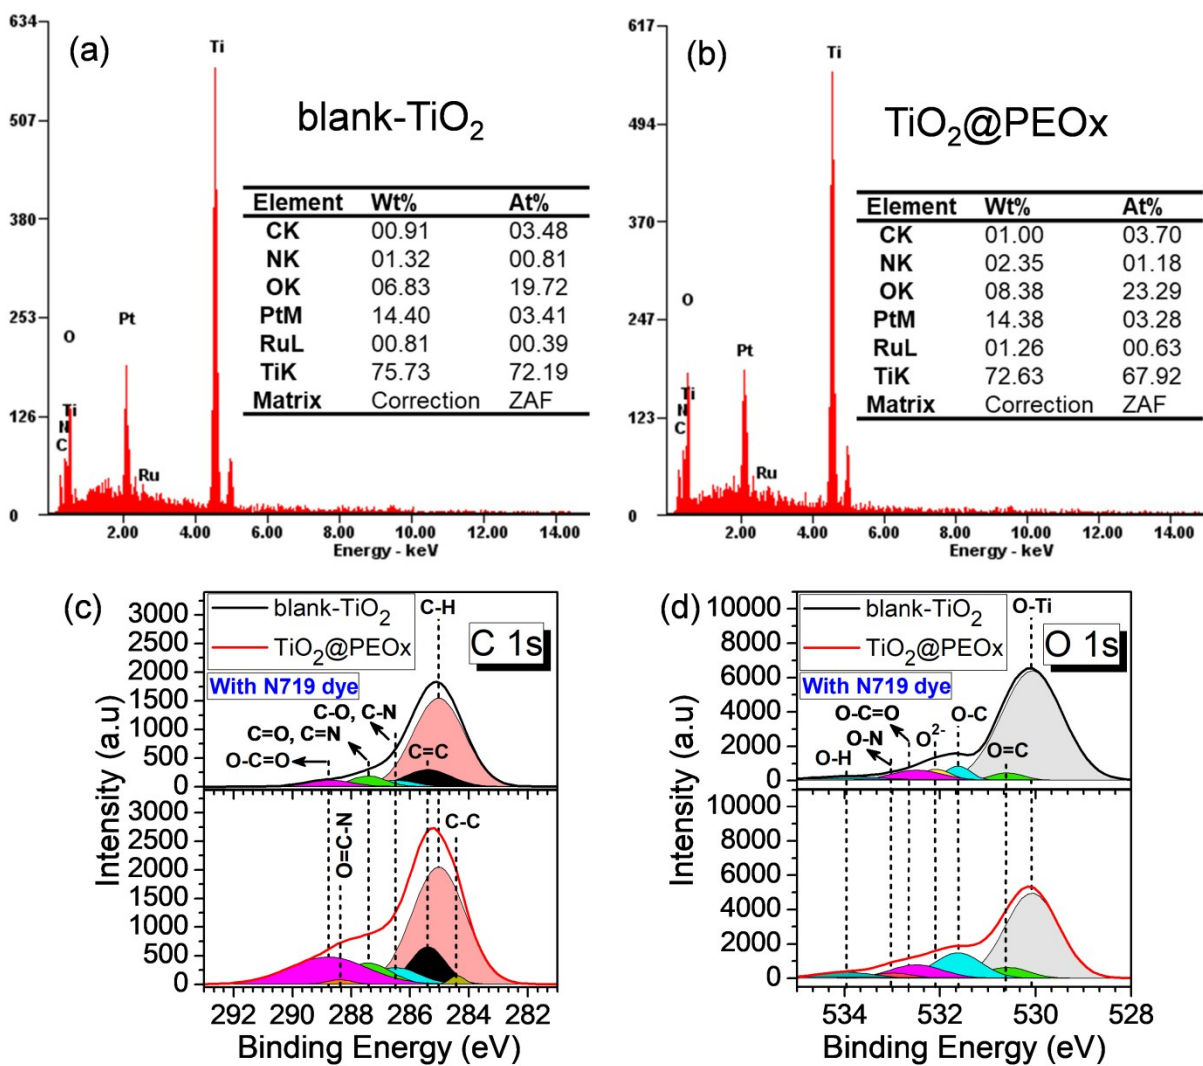

**Fig. S8.** Spectra for blank-TiO<sub>2</sub> and TiO<sub>2</sub>@PEOx samples with dye immersion for 24 h obtained by (a, b) EDS, (c) C 1s and (d) O 1s XPS.

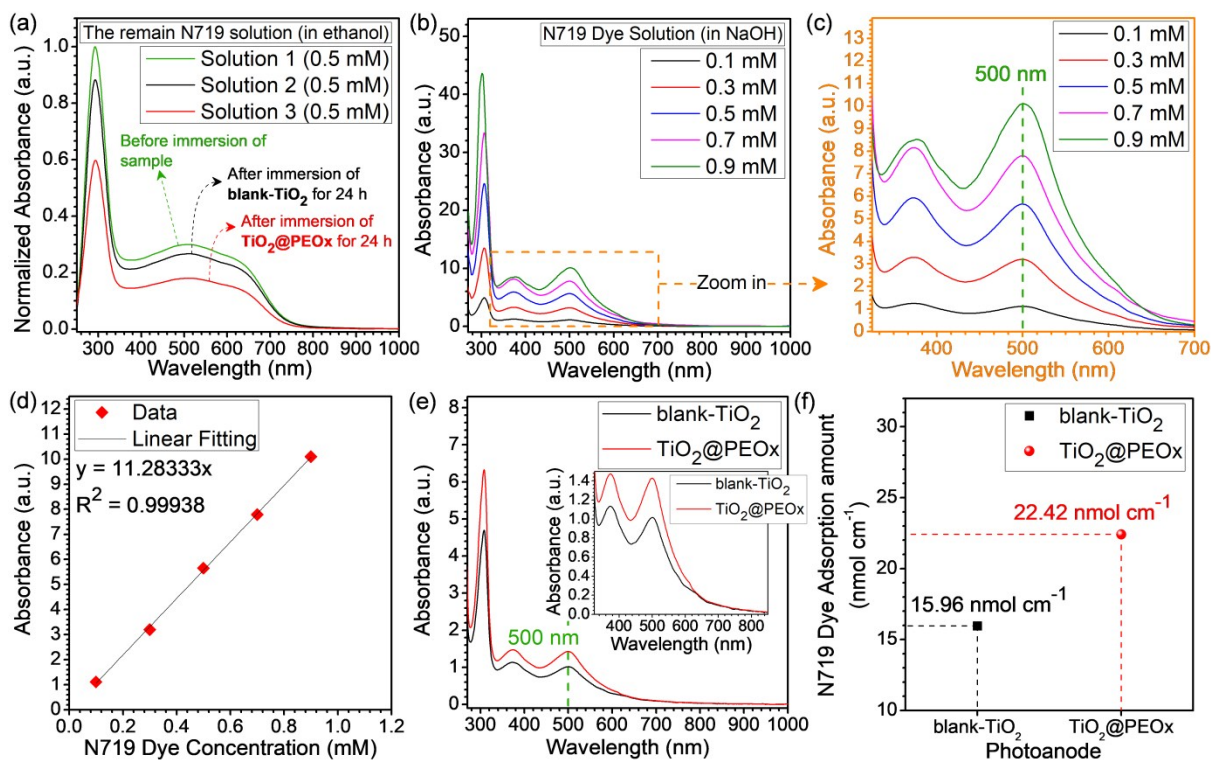

**Fig. S9.** (a) UV-vis spectra of 0.5 mM N719 dye-ethanol solutions, where Solution 1 has not undergone any photoanode immersion, Solution 2 has undergone blank-TiO<sub>2</sub> sample immersion for 24 h, and Solution 3 has undergone TiO<sub>2</sub>@PEOx sample immersion for 24 h. (b) UV-vis spectra of N719 dye, at varied concentrations, in 0.1 M aqueous NaOH solutions. (c) The enlarged UV-Vis spectra from panel (b). (d) Calibration curve obtained from the UV-vis spectra depicted in panels (b) and (c). (e) UV-vis spectra of the desorbed N719 dye on blank-TiO<sub>2</sub> and TiO<sub>2</sub>@PEOx surfaces. The N719 dye was desorbed by 0.1 M aqueous NaOH solution. The inset shows enlarged spectra from panel (e). (f) N719 dye loading adsorbed on blank-TiO<sub>2</sub> and TiO<sub>2</sub>@PEOx samples calculated from the data in panels (d) and (e).

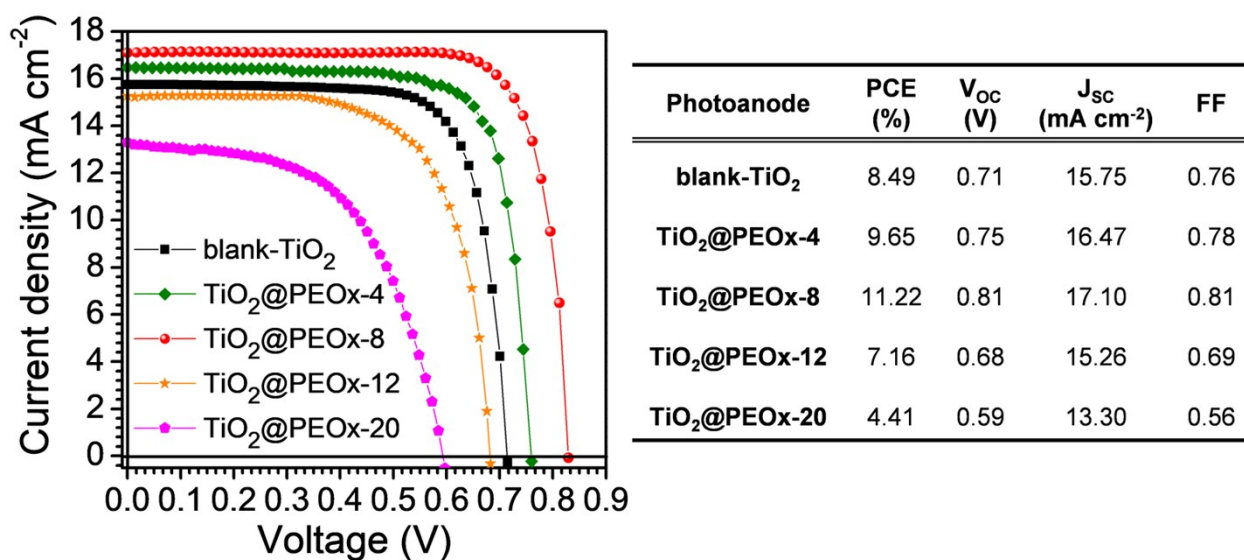

**Fig. S10.**  $J$ - $V$  characteristics, under the 1 sun (1.5G) illumination condition, of blank-TiO<sub>2</sub>-based and the TiO<sub>2</sub>@PEOx-based FDSSCs with PEOx concentrations varied between 4-20 mg ml<sup>-1</sup>.

## Supporting Tables

**Table S1.** Summary of the full-range XPS spectra shown in **Fig. 2a, e**.

| Photoanode                           | Atomic Percent (%) |       |       |       |       |      | Total  |
|--------------------------------------|--------------------|-------|-------|-------|-------|------|--------|
|                                      | C 1s               | O 1s  | Ti 2p | N 1s  | Ru 3d | S 2p |        |
| <b>Before the N719 dye immersion</b> |                    |       |       |       |       |      |        |
| blank-TiO <sub>2</sub>               | 25.62              | 51.43 | 22.95 | —     | —     | —    | 100.00 |
| TiO <sub>2</sub> @PEOx               | 28.94              | 47.06 | 21.38 | 2.62  | —     | —    | 100.00 |
| <b>After the N719 dye immersion</b>  |                    |       |       |       |       |      |        |
| blank-TiO <sub>2</sub>               | 39.50              | 34.47 | 13.37 | 9.52  | 2.75  | 0.38 | 100.00 |
| TiO <sub>2</sub> @PEOx               | 52.13              | 22.41 | 7.03  | 12.93 | 4.54  | 0.96 | 100.00 |

**Table S2.** Summary of de-convoluted XPS results for blank-TiO<sub>2</sub> and TiO<sub>2</sub>@PEOx photoanode samples without dye immersion, corresponding to **Fig. 2b, 2c, S7c, and S7d.**

| Photoanode                     | Bonding species                  | Peak position (eV) | Peak Area       | Bond content (%) | Peak FWHM (eV) |
|--------------------------------|----------------------------------|--------------------|-----------------|------------------|----------------|
| <b>XPS peak region = N 1s</b>  |                                  |                    |                 |                  |                |
| blank-TiO <sub>2</sub>         | —                                | —                  | —               | —                | —              |
|                                | —                                | —                  | —               | —                | —              |
|                                | <b>Total</b>                     |                    | —               | —                | —              |
| TiO <sub>2</sub> @PEOx         | N=C                              | 398.53             | 172.49          | 27.85            | 1.29           |
|                                | N-C=O (Amide)                    | 400.05             | 372.34          | 60.12            | 1.30           |
|                                | N-C                              | 401.90             | 74.49           | 12.03            | 1.39           |
|                                | <b>Total</b>                     |                    | <b>619.32</b>   | <b>100.00</b>    | —              |
| <b>XPS peak region = Ti 2p</b> |                                  |                    |                 |                  |                |
| blank-TiO <sub>2</sub>         | Ti <sup>3+</sup>                 | 457.10             | 662.44          | 3.51             | 1.39           |
|                                | Ti <sup>4+</sup>                 | 458.85             | 11628.25        | 61.63            | 1.30           |
|                                | Ti <sup>3+</sup>                 | 463.35             | 1914.97         | 10.15            | 5.00           |
|                                | Ti <sup>4+</sup>                 | 464.60             | 4660.92         | 24.70            | 1.94           |
|                                | <b>Total</b>                     |                    | <b>18866.58</b> | <b>100.00</b>    | —              |
| TiO <sub>2</sub> @PEOx         | Ti <sup>3+</sup>                 | 456.85             | 125.25          | 1.15             | 0.75           |
|                                | Ti <sup>4+</sup>                 | 458.60             | 7551.93         | 69.42            | 1.36           |
|                                | Ti <sup>3+</sup>                 | 463.05             | 118.00          | 1.08             | 1.39           |
|                                | Ti <sup>4+</sup>                 | 464.23             | 3084.07         | 28.35            | 1.99           |
|                                | <b>Total</b>                     |                    | <b>10879.25</b> | <b>100.00</b>    | —              |
| <b>XPS peak region = C 1s</b>  |                                  |                    |                 |                  |                |
| blank-TiO <sub>2</sub>         | C-C (sp <sup>2</sup> )           | 284.40             | 0.10            | 0.00             | 0.50           |
|                                | C-H                              | 285.03             | 1802.49         | 87.41            | 1.94           |
|                                | C-O, C-N                         | 286.50             | 40.01           | 1.94             | 1.00           |
|                                | C=O, C=N                         | 287.42             | 96.19           | 4.66             | 1.23           |
|                                | O=C-N (Amide)                    | 288.40             | 0.10            | 0.00             | 0.10           |
|                                | O-C=O                            | 288.78             | 123.23          | 5.98             | 1.09           |
|                                | <b>Total</b>                     |                    | <b>2062.12</b>  | <b>100.00</b>    | —              |
| TiO <sub>2</sub> @PEOx         | C-C (sp <sup>2</sup> )           | 284.40             | 173.84          | 5.17             | 2.18           |
|                                | C-H                              | 285.03             | 2401.87         | 71.37            | 1.60           |
|                                | C-O, C-N                         | 286.50             | 332.24          | 9.87             | 0.78           |
|                                | C=O, C=N                         | 287.42             | 201.45          | 5.99             | 0.89           |
|                                | O=C-N (Amide)                    | 288.40             | 182.00          | 5.41             | 0.87           |
|                                | O-C=O                            | 288.78             | 74.21           | 2.20             | 0.75           |
|                                | <b>Total</b>                     |                    | <b>3365.61</b>  | <b>100.00</b>    | —              |
| <b>XPS peak region = O 1s</b>  |                                  |                    |                 |                  |                |
| blank-TiO <sub>2</sub>         | O-Ti                             | 530.08             | 13620.71        | 87.22            | 1.52           |
|                                | O=C                              | 530.60             | 174.82          | 1.12             | 0.50           |
|                                | O-C                              | 531.63             | 187.29          | 1.20             | 0.65           |
|                                | O <sup>2-</sup> (oxygen vacancy) | 532.09             | 709.85          | 4.55             | 1.28           |
|                                | O-C=O                            | 532.50             | 644.72          | 4.13             | 1.20           |
|                                | O-H                              | 534.00             | 278.50          | 1.78             | 1.22           |
|                                | <b>Total</b>                     |                    | <b>15615.89</b> | <b>100.00</b>    | —              |
| TiO <sub>2</sub> @PEOx         | O-Ti                             | 530.08             | 10892.82        | 83.64            | 1.38           |
|                                | O=C                              | 530.60             | 174.08          | 1.34             | 0.57           |
|                                | O-C                              | 531.63             | 1297.15         | 9.96             | 1.04           |
|                                | O <sup>2-</sup>                  | 532.09             | 10.92           | 0.08             | 0.18           |
|                                | O-C=O                            | 532.50             | 560.24          | 4.30             | 1.21           |
|                                | O-H                              | 533.00             | 87.65           | 0.67             | 1.27           |
|                                | <b>Total</b>                     |                    | <b>13022.86</b> | <b>100.00</b>    | —              |

**Table S3.** Summary of de-convoluted XPS results of blank-TiO<sub>2</sub> and TiO<sub>2</sub>@PEOx photoanode samples with dye immersion for 24 h corresponding to Fig. 2f, S8c, and S8d.

| Photoanode                    | Bonding species                  | Peak position (eV) | Peak area       | Bond content (%) | Peak FWHM (eV) |
|-------------------------------|----------------------------------|--------------------|-----------------|------------------|----------------|
| <b>XPS peak region = N 1s</b> |                                  |                    |                 |                  |                |
| blank-TiO <sub>2</sub>        | N=C=S (NCS)                      | 397.85             | 19.30           | 6.26             | 1.60           |
|                               | N=C                              | 398.62             | 73.88           | 23.95            | 2.22           |
|                               | Pyridine ring                    | 399.87             | 196.86          | 63.81            | 1.70           |
|                               | N-C=O (Amide)                    | 400.36             | 0.00            | 0.00             | 0.00           |
|                               | N-O                              | 400.94             | 0.00            | 0.00             | 0.00           |
|                               | N-C                              | 401.62             | 12.36           | 4.06             | 1.16           |
|                               | TBA                              | 402.67             | 5.92            | 1.92             | 1.56           |
| <b>Total</b>                  |                                  |                    | <b>308.32</b>   | <b>100.00</b>    | —              |
| TiO <sub>2</sub> @PEOx        | N=C=S (NCS)                      | 397.85             | 108.58          | 6.72             | 1.19           |
|                               | N=C                              | 398.62             | 501.57          | 31.03            | 1.68           |
|                               | Pyridine ring                    | 399.87             | 676.44          | 41.85            | 1.16           |
|                               | N-C=O (Amide)                    | 400.36             | 35.90           | 2.22             | 1.15           |
|                               | N-O                              | 400.94             | 187.28          | 11.59            | 1.53           |
|                               | N-C                              | 401.62             | 37.60           | 2.33             | 1.31           |
|                               | TBA                              | 402.67             | 68.88           | 4.26             | 1.36           |
| <b>Total</b>                  |                                  |                    | <b>1616.25</b>  | <b>100.00</b>    | —              |
| <b>XPS peak region = C 1s</b> |                                  |                    |                 |                  |                |
| blank-TiO <sub>2</sub>        | C-C (sp <sup>2</sup> )           | 284.40             | 0.00            | 0.00             | 0.00           |
|                               | C-H                              | 285.03             | 3372.21         | 72.37            | 2.05           |
|                               | C=C (sp <sup>3</sup> )           | 285.40             | 582.78          | 12.51            | 1.85           |
|                               | C-O, C-N                         | 286.50             | 190.43          | 4.09             | 1.63           |
|                               | C=O, C=N                         | 287.42             | 282.25          | 6.06             | 1.42           |
|                               | N-C=O (Amide)                    | 288.39             | 0.00            | 0.00             | 0.00           |
|                               | O-C=O                            | 288.78             | 231.74          | 4.97             | 1.92           |
| <b>Total</b>                  |                                  |                    | <b>4659.41</b>  | <b>100.00</b>    | —              |
| TiO <sub>2</sub> @PEOx        | C-C (sp <sup>2</sup> )           | 284.40             | 93.58           | 1.08             | 0.57           |
|                               | C-H                              | 285.03             | 4645.82         | 53.49            | 2.13           |
|                               | C=C (sp <sup>3</sup> )           | 285.40             | 977.59          | 11.26            | 1.40           |
|                               | C-O, C-N                         | 286.50             | 586.88          | 6.76             | 1.89           |
|                               | C=O, C=N                         | 287.42             | 714.93          | 8.23             | 1.80           |
|                               | N-C=O (Amide)                    | 288.39             | 84.58           | 0.97             | 1.01           |
|                               | O-C=O                            | 288.78             | 1581.61         | 18.21            | 3.13           |
| <b>Total</b>                  |                                  |                    | <b>8684.99</b>  | <b>100.00</b>    | —              |
| <b>XPS peak region = O 1s</b> |                                  |                    |                 |                  |                |
| blank-TiO <sub>2</sub>        | O-Ti                             | 530.08             | 10187.39        | 78.93            | 1.50           |
|                               | O=C                              | 530.60             | 370.16          | 2.87             | 0.79           |
|                               | O-C                              | 531.63             | 555.55          | 4.30             | 0.61           |
|                               | O <sup>2-</sup> (oxygen vacancy) | 532.09             | 504.14          | 3.91             | 0.72           |
|                               | O-C=O                            | 532.50             | 823.04          | 6.38             | 1.29           |
|                               | O-N                              | 533.00             | 0.10            | 0.00             | 0.10           |
|                               | O-H                              | 534.00             | 467.17          | 3.62             | 1.87           |
| <b>Total</b>                  |                                  |                    | <b>12907.55</b> | <b>100.00</b>    | —              |
| TiO <sub>2</sub> @PEOx        | O-Ti                             | 530.08             | 7022.60         | 60.79            | 1.33           |
|                               | O=C                              | 530.60             | 721.76          | 6.25             | 1.07           |
|                               | O-C                              | 531.63             | 1852.75         | 16.04            | 1.17           |
|                               | O <sup>2-</sup> (oxygen vacancy) | 532.09             | 1.52            | 0.01             | 0.67           |
|                               | O-C=O                            | 532.50             | 1090.19         | 9.44             | 1.30           |
|                               | O-N                              | 533.00             | 325.65          | 2.82             | 1.00           |
|                               | O-H                              | 534.00             | 537.73          | 4.65             | 1.39           |
| <b>Total</b>                  |                                  |                    | <b>11552.20</b> | <b>100.00</b>    | —              |

**Table S4.** Comparison of the performance of TiO<sub>2</sub>@PEOx-based FDSSC and other FDSSC examples reported in the literature.

| Year        | Photoanode                            | Photoanode current collector | Counter electrode                     | N719 dye concentration (mM) | PCE (%)       | V <sub>oc</sub> (V) | J <sub>sc</sub> (mA cm <sup>-2</sup> ) | FF           | Reference number |                        |
|-------------|---------------------------------------|------------------------------|---------------------------------------|-----------------------------|---------------|---------------------|----------------------------------------|--------------|------------------|------------------------|
|             |                                       |                              |                                       |                             |               |                     |                                        |              | Main article     | Supporting information |
| <b>2019</b> | <b>TiO<sub>2</sub>@PEOx</b>           | <b>Ti wire</b>               | <b>Pt wire</b>                        | <b>0.50</b>                 | <b>11.21</b>  | <b>0.80</b>         | <b>17.04</b>                           | <b>0.82</b>  | <b>This work</b> |                        |
| 2019        | TiO <sub>2</sub> nanotube             | Ti wire                      | CF@PANI@CoSe<br>Pt wire               | 0.50                        | 10.28<br>8.34 | 0.73<br>0.76        | 17.65<br>16.33                         | 0.80<br>0.68 | 38               | (S1)                   |
| 2019        | TiO <sub>2</sub> -rGO                 | Stainless steel wire         | Pt wire                               | 0.30                        | 5.36          | 0.79                | 12.94                                  | 0.52         | 39               | S2                     |
| 2018        | TiO <sub>2</sub> microridge/nanorods  | Ti wire                      | Pt wire                               | 0.50                        | 8.13          | 0.70                | 14.79                                  | 0.78         | 8                | S3                     |
| 2018        | TiO <sub>2</sub> nanowire             | Ti wire                      | Pt wire                               | 0.50                        | 3.13          | 0.69                | 7.58                                   | 0.60         | 9                | S4                     |
| 2018        | TiO <sub>2</sub> nanotube             | Ti wire                      | Pt-modified CS-CNT fibre<br>Pt wire   | 0.30                        | 10.00<br>6.11 | 0.73<br>0.74        | 19.43<br>14.59                         | 0.71<br>0.56 | 40               | S5                     |
| 2017        | TiO <sub>2</sub> nanotube             | Ti wire                      | CF@TiO <sub>2</sub> @MoS <sub>2</sub> | 0.30                        | 9.50          | 0.74                | 16.95                                  | 0.75         | 41               | S6                     |
| 2016        | TiO <sub>2</sub> micron-cone-nanowire | Ti wire                      | Pt wire                               | 0.50                        | 4.75          | 0.67                | 10.44                                  | 0.68         | 6                | S7                     |
| 2016        | TiO <sub>2</sub> nanotube             | Ti wire                      | Pt-coated carbon fibre                | 0.30                        | 5.64          | 0.74                | 11.92                                  | 0.64         | 30               | S8                     |
| 2015        | TiO <sub>2</sub> micron-cone          | Ti wire                      | Pt wire                               | 0.50                        | 8.07          | 0.70                | 16.04                                  | 0.72         | 42               | S9                     |
| 2015        | TiO <sub>2</sub> nanotube             | Ti wire                      | RACNTs fibre<br>Pt wire               | 0.50                        | 6.80<br>2.74  | 0.70<br>0.67        | 14.50<br>12.01                         | 0.67<br>0.34 | 43               | S10                    |
| 2015        | TiO <sub>2</sub> nanotube             | Ti wire                      | Graphene fibre<br>Pt wire             | 0.30                        | 3.25<br>2.14  | 0.58<br>—           | 14.10<br>—                             | 0.40<br>—    | 44               | S11                    |
| 2014        | TiO <sub>2</sub> nanotube             | Ti wire                      | MWCNT fibre                           | 0.30                        | 7.13          | 0.71                | 16.28                                  | 0.61         | 45               | S12                    |
| 2014        | TiO <sub>2</sub> nanotube             | Ti wire                      | CNT/GNRPt Fibre                       | 0.30                        | 6.83          | 0.69                | 13.55                                  | 0.73         | 46               | S13                    |
| 2012        | TiO <sub>2</sub> NRs-coated CFs       | CFs (carbon fibres)          | Pt-coated optical fibre               | 0.30                        | 1.28          | 0.61                | 4.58                                   | 0.46         | 47               | S14                    |
| 2011        | TiO <sub>2</sub> nanotube             | Ti wire                      | Pt wire                               | 0.30                        | 5.84          | 0.64                | 13.62                                  | 0.67         | 48               | S15                    |
| 2010        | TiO <sub>2</sub> nanotube             | Ti wire                      | Pt wire                               | 0.50                        | 2.78          | 0.52                | 10.90                                  | 0.48         | 49               | S16                    |
| 2010        | TiO <sub>2</sub> nanotube             | Ti wire                      | Pt wire                               | 0.50                        | 4.10          | 0.69                | 11.65                                  | 0.51         | 50               | S17                    |

**Table S5.** EIS parameters of **Fig. 6c, 6d, 6f** and **6g**, simulated by the equivalent circuit depicted in **Fig. 6a, 6b**.

| Photoanode             | Applied Voltage (V) | $R_{Ti}$ ( $\Omega$ cm) | $R_{Pt}$ ( $\Omega$ cm) | $R_{TT}$ ( $\Omega$ cm) | $C_{Ti}$ ( $F$ cm $^{-1}$ ) | $C_{Pt}$ ( $F$ cm $^{-1}$ ) | $C_{TT}$ ( $F$ cm $^{-1}$ ) |
|------------------------|---------------------|-------------------------|-------------------------|-------------------------|-----------------------------|-----------------------------|-----------------------------|
| blank-TiO <sub>2</sub> | 0.20                | 56.79                   | 105.07                  | 123.20                  | $2.65 \times 10^{-6}$       | $6.10 \times 10^{-4}$       | $5.39 \times 10^{-11}$      |
|                        | 0.40                | 46.07                   | 72.43                   | 79.19                   | $1.73 \times 10^{-6}$       | $2.95 \times 10^{-4}$       | $2.43 \times 10^{-11}$      |
|                        | 0.60                | 42.69                   | 58.42                   | 66.23                   | $1.66 \times 10^{-6}$       | $2.62 \times 10^{-4}$       | $1.40 \times 10^{-11}$      |
|                        | 0.80                | 18.01                   | 45.08                   | 50.35                   | $1.53 \times 10^{-6}$       | $2.20 \times 10^{-4}$       | $1.24 \times 10^{-11}$      |
|                        | 1.00                | 17.66                   | 31.24                   | 35.34                   | $1.24 \times 10^{-6}$       | $2.08 \times 10^{-4}$       | $1.14 \times 10^{-11}$      |
| TiO <sub>2</sub> @PEOx | 0.20                | 56.48                   | 102.40                  | 122.50                  | $2.63 \times 10^{-6}$       | $5.93 \times 10^{-4}$       | $5.19 \times 10^{-11}$      |
|                        | 0.40                | 36.58                   | 67.00                   | 76.50                   | $1.70 \times 10^{-6}$       | $2.92 \times 10^{-4}$       | $2.41 \times 10^{-11}$      |
|                        | 0.60                | 34.81                   | 55.70                   | 65.30                   | $1.64 \times 10^{-6}$       | $2.54 \times 10^{-4}$       | $1.35 \times 10^{-11}$      |
|                        | 0.80                | 15.49                   | 43.08                   | 46.10                   | $1.50 \times 10^{-6}$       | $2.13 \times 10^{-4}$       | $1.16 \times 10^{-11}$      |
|                        | 1.00                | 13.30                   | 29.33                   | 34.30                   | $1.23 \times 10^{-6}$       | $1.97 \times 10^{-4}$       | $1.08 \times 10^{-11}$      |



## Supporting Information References

- S1 J. Zhang, Z. Wang, X. Li, J. Yang, C. Song, Y. Li, J. Cheng, Q. Guan and B. Wang, *ACS Appl. Energy Mater.*, 2019, **2**, 2870–2877.
- S2 X. Y. Gu, E. Z. Chen, M. Y. Ma, Z. Y. Yang, J. L. Bai, L. L. Chen, G. Z. Sun, Z. X. Zhang, X. Jun Pan, J. Y. Zhou and E. Q. Xie, *J. Phys. D: Appl. Phys.*, 2019, **52**, 095502.
- S3 G. Liu, M. Wang, H. Wang, R. E. A. Ardhi, H. Yu, D. Zou and J. K. Lee, *Nano Energy*, 2018, **49**, 95–102.
- S4 G. Liu, H. Wang, M. Wang, W. Liu, R. E. A. Ardhi, D. Zou and J. K. Lee, *Electrochim. Acta*, 2018, **167**, 34–40.
- S5 X. Fu, H. Sun, S. Xie, J. Zhang, Z.g Pan, M. Liao, L. Xu, Z. Li, B. Wang, X. Sun and H. Peng, *J. Mater. Chem. A*, 2018, **6**, 45–51.
- S6 J. Liang, G. Zhu, C. Wang, Y. Wang, H. Zhu, Y. Hu, H. Lv, R. Chen, L. Ma, T. Chen, Z. Jin and J. Liu, *Adv. Energy Mater.*, 2017, **7**, 1601208.
- S7 G. Liu, X. Gao, H. Wang, A. Y. Kim, Z. Zhao, J. K. Lee and D. Zou, *J. Mater. Chem. A*, 2016, **4**, 5925–5931.
- S8 Z. Wen, M. H. Yeh, H. Guo, J. Wang, Y. Zi, W. Xu, J. Deng, L. Zhu, X. Wang, C. Hu, L. Zhu, X. Sun and Z. L. Wang, *Sci. Adv.*, 2016, **2**, e1600097.
- S9 G. Liu, M. Peng, W. Song, H. Wang and D. Zou, *Nano Energy*, 2015, **11**, 341–347.
- S10 Y. Xue, Y. Ding, J. Niu, Z. Xia, A. Roy, H. Chen, J. Qu, Z. L. Wang and L. Dai, *Sci. Adv.*, 2015, **1**, 1400198.
- S11 T. Chen and L. Dai, *Angew. Chem. Int. Ed.*, 2015, **54**, 14947.
- S12 Z. Yang, J. Deng, X. Sun, H. Li and H. Peng, *Adv. Mater.*, 2014, **26**, 2643–2647.

- S13 X. Fang, Z. Yang, L. Qiu, H. Sun, S. Pan, J. Deng, Y. Luo and H. Peng, *Adv. Mater.*, 2014, **26**, 1694–1698.
- S14 W. Guo, C. Xu, X. Wang, S. Wang, C. Pan, C. Lin and Z. L. Wang, *J. Am. Chem. Soc.*, 2012, **134**, 4437–4441.
- S15 S. Huang, X. Guo, X. Huang, Q. Zhang, H. Sun, D. Li, Y. Luo and Q. Meng, *Nanotechnology*, 2011, **22**, 315402.
- S16 Z. Liu and M. Misra, *ACS Nano*, 2010, **4**, 2196–2200.
- S17 Y. Liu, M. Li, H. Wang, J. Zheng, H. Xu, Q. Ye and H. Shen, *J. Phys. D: Appl. Phys.*, 2010, **43**, 205103.
